# Supplementary material
Source: MDPI journal article supplement (https://www.mdpi.com/2673-9976/3/1/39)
Supplement: s1 [file s1]

Archive with 1 entries (1 files):
- blsf-1500911-supplementary.pdf
